# Supplementary material for: Characterization of the complete chloroplast genomes of five Populus species from the western Sichuan plateau, southwest China: comparative and phylogenetic analyses
Source: PeerJ. 2019 Feb 20;7:e6386. doi: 10.7717/peerj.6386 (PMC6387583; doi:10.7717/peerj.6386)
Supplement: Supplemental Information 1 [file peerj-07-6386-s001.xlsx]

## Sheet: Table S1
Table S1 Genbank accession numbers of the Populus, Salix and outgroups with chloroplast genome sequences used for phylogenetic analyses
Genera	Species	Source	Genebank accession
Populus L.	Populus alba	NCBI	AP008956
	Populus adenopoda	NCBI	KX425622
	Populus balsamifera	NCBI	KJ664927
	Populus davidiana	NCBI	KX306825
	Populus euphratica	NCBI	KJ624919
	Populus fremontii	NCBI	KJ664926
	Populus ilicifolia	NCBI	KX421095
	Populus lasiocarpa	NCBI	KX641589
	Populus nigra	NCBI	KX377117
	Populus pruinosa	NCBI	MG262355
	Populus qiongdaoensis	NCBI	KX534066
	Populus rotundifolia	NCBI	KX425853
	Populus tremula	NCBI	KP861984
	Populus tremula x alba	NCBI	KT780870
	Populus trichocarpa	NCBI	EF489041
	Populus wilsonii	NCBI	MG214781
	Populus yunnanensis	NCBI	KP729176
	Populus xiangchengensis	Our report	MH910611(Zong et al., in press)
	Populus cathayana	Our report	MK267318 (unpublish)
	Populus kangdingensis	Our report	MK267310 (unpublish)
	Populus pseudoglauca	Our report	MK267308 (unpublish)
	Populus schneideri	Our report	MK267305 (unpublish)
Salix L.	Salix babylonica	NCBI	KT449800
	Salix chaenomeloides	NCBI	MG262362
	Salix interior	NCBI	KJ742926
	Salix paraplesia	NCBI	MG262366
	Salix tetrasperm	NCBI	MF189169
Outgroups	Idesia polycarpa	NCBI	KX229742
	Itoa orientalis	NCBI	MG262342
