# Supplementary material for: Characterization of the complete chloroplast genomes of five Populus species from the western Sichuan plateau, southwest China: comparative and phylogenetic analyses
Source: PeerJ. 2019 Feb 20;7:e6386. doi: 10.7717/peerj.6386 (PMC6387583; doi:10.7717/peerj.6386)
Supplement: Supplemental Information 3 [file peerj-07-6386-s003.xlsx]

## Sheet: Table S3
Table S3 Codon usage in the five Populus plastomes
P. cathayana				P. kangdingensis				P. pseudoglauca				P. schneideri				P. xiangchengensis
Codon	Count	RSCU		Codon	Count	RSCU		Codon	Count	RSCU		Codon	Count	RSCU		Codon	Count	RSCU
UUU(F)	972	1.31		UUU(F)	971	1.3		UUU(F)	971	1.3		UUU(F)	971	1.3		UUU(F)	966	1.31
UUC(F)	510	0.69		UUC(F)	518	0.7		UUC(F)	518	0.7		UUC(F)	518	0.7		UUC(F)	513	0.69
UUA(L)	844	1.88		UUA(L)	843	1.87		UUA(L)	843	1.87		UUA(L)	843	1.87		UUA(L)	840	1.87
UUG(L)	543	1.21		UUG(L)	543	1.21		UUG(L)	543	1.21		UUG(L)	543	1.21		UUG(L)	543	1.21
CUU(L)	568	1.26		CUU(L)	574	1.28		CUU(L)	574	1.28		CUU(L)	574	1.28		CUU(L)	567	1.26
CUC(L)	173	0.38		CUC(L)	171	0.38		CUC(L)	171	0.38		CUC(L)	171	0.38		CUC(L)	171	0.38
CUA(L)	391	0.87		CUA(L)	390	0.87		CUA(L)	390	0.87		CUA(L)	390	0.87		CUA(L)	394	0.88
CUG(L)	180	0.4		CUG(L)	177	0.39		CUG(L)	177	0.39		CUG(L)	177	0.39		CUG(L)	178	0.4
AUU(I)	1073	1.47		AUU(I)	1080	1.47		AUU(I)	1080	1.47		AUU(I)	1080	1.47		AUU(I)	1078	1.48
AUC(I)	421	0.58		AUC(I)	418	0.57		AUC(I)	418	0.57		AUC(I)	418	0.57		AUC(I)	422	0.58
AUA(I)	692	0.95		AUA(I)	699	0.95		AUA(I)	699	0.95		AUA(I)	699	0.95		AUA(I)	692	0.95
AUG(M)	588	1		AUG(M)	591	1		AUG(M)	591	1		AUG(M)	591	1		AUG(M)	589	1
GUU(V)	466	1.42		GUU(V)	465	1.42		GUU(V)	465	1.42		GUU(V)	465	1.42		GUU(V)	466	1.42
GUC(V)	161	0.49		GUC(V)	159	0.48		GUC(V)	159	0.48		GUC(V)	159	0.48		GUC(V)	160	0.49
GUA(V)	495	1.5		GUA(V)	494	1.5		GUA(V)	494	1.5		GUA(V)	494	1.5		GUA(V)	495	1.51
GUG(V)	194	0.59		GUG(V)	195	0.59		GUG(V)	195	0.59		GUG(V)	195	0.59		GUG(V)	194	0.59
UCU(S)	565	1.72		UCU(S)	564	1.71		UCU(S)	564	1.71		UCU(S)	564	1.71		UCU(S)	568	1.72
UCC(S)	324	0.99		UCC(S)	325	0.99		UCC(S)	326	0.99		UCC(S)	325	0.99		UCC(S)	326	0.99
UCA(S)	397	1.21		UCA(S)	401	1.22		UCA(S)	401	1.22		UCA(S)	401	1.22		UCA(S)	396	1.2
UCG(S)	181	0.55		UCG(S)	180	0.55		UCG(S)	180	0.55		UCG(S)	180	0.55		UCG(S)	183	0.56
CCU(P)	405	1.59		CCU(P)	405	1.59		CCU(P)	405	1.59		CCU(P)	405	1.59		CCU(P)	405	1.59
CCC(P)	190	0.75		CCC(P)	192	0.75		CCC(P)	191	0.75		CCC(P)	192	0.75		CCC(P)	190	0.75
CCA(P)	288	1.13		CCA(P)	286	1.12		CCA(P)	286	1.12		CCA(P)	286	1.12		CCA(P)	288	1.13
CCG(P)	136	0.53		CCG(P)	135	0.53		CCG(P)	135	0.53		CCG(P)	135	0.53		CCG(P)	136	0.53
ACU(T)	479	1.54		ACU(T)	478	1.53		ACU(T)	479	1.53		ACU(T)	478	1.53		ACU(T)	475	1.53
ACC(T)	237	0.76		ACC(T)	237	0.76		ACC(T)	237	0.76		ACC(T)	237	0.76		ACC(T)	235	0.76
ACA(T)	402	1.29		ACA(T)	408	1.3		ACA(T)	408	1.3		ACA(T)	408	1.3		ACA(T)	403	1.3
ACG(T)	129	0.41		ACG(T)	129	0.41		ACG(T)	129	0.41		ACG(T)	129	0.41		ACG(T)	128	0.41
GCU(A)	579	1.79		GCU(A)	582	1.81		GCU(A)	581	1.8		GCU(A)	582	1.81		GCU(A)	577	1.79
GCC(A)	206	0.64		GCC(A)	205	0.64		GCC(A)	205	0.64		GCC(A)	205	0.64		GCC(A)	207	0.64
GCA(A)	369	1.14		GCA(A)	362	1.12		GCA(A)	362	1.12		GCA(A)	362	1.12		GCA(A)	363	1.13
GCG(A)	137	0.42		GCG(A)	140	0.43		GCG(A)	140	0.43		GCG(A)	140	0.43		GCG(A)	139	0.43
UAU(Y)	771	1.65		UAU(Y)	770	1.65		UAU(Y)	770	1.65		UAU(Y)	770	1.65		UAU(Y)	767	1.65
UAC(Y)	164	0.35		UAC(Y)	164	0.35		UAC(Y)	164	0.35		UAC(Y)	164	0.35		UAC(Y)	165	0.35
UAA(*)	31	1.6		UAA(*)	32	1.66		UAA(*)	32	1.66		UAA(*)	32	1.66		UAA(*)	31	1.6
UAG(*)	13	0.67		UAG(*)	13	0.67		UAG(*)	13	0.67		UAG(*)	13	0.67		UAG(*)	13	0.67
CAU(H)	459	1.5		CAU(H)	459	1.5		CAU(H)	459	1.5		CAU(H)	459	1.5		CAU(H)	463	1.51
CAC(H)	153	0.5		CAC(H)	153	0.5		CAC(H)	153	0.5		CAC(H)	153	0.5		CAC(H)	152	0.49
CAA(Q)	690	1.55		CAA(Q)	690	1.55		CAA(Q)	690	1.55		CAA(Q)	690	1.55		CAA(Q)	693	1.55
CAG(Q)	203	0.45		CAG(Q)	203	0.45		CAG(Q)	203	0.45		CAG(Q)	203	0.45		CAG(Q)	203	0.45
AAU(N)	977	1.54		AAU(N)	979	1.54		AAU(N)	979	1.54		AAU(N)	979	1.54		AAU(N)	971	1.54
AAC(N)	289	0.46		AAC(N)	293	0.46		AAC(N)	293	0.46		AAC(N)	293	0.46		AAC(N)	292	0.46
AAA(K)	1026	1.47		AAA(K)	1033	1.48		AAA(K)	1033	1.48		AAA(K)	1033	1.48		AAA(K)	1025	1.47
AAG(K)	367	0.53		AAG(K)	367	0.52		AAG(K)	367	0.52		AAG(K)	367	0.52		AAG(K)	367	0.53
GAU(D)	820	1.58		GAU(D)	819	1.58		GAU(D)	819	1.58		GAU(D)	819	1.58		GAU(D)	823	1.58
GAC(D)	220	0.42		GAC(D)	216	0.42		GAC(D)	216	0.42		GAC(D)	216	0.42		GAC(D)	219	0.42
GAA(E)	1024	1.49		GAA(E)	1038	1.5		GAA(E)	1038	1.5		GAA(E)	1038	1.5		GAA(E)	1025	1.5
GAG(E)	346	0.51		GAG(E)	343	0.5		GAG(E)	343	0.5		GAG(E)	343	0.5		GAG(E)	343	0.5
UGU(C)	199	1.38		UGU(C)	199	1.38		UGU(C)	199	1.38		UGU(C)	199	1.38		UGU(C)	199	1.38
UGC(C)	89	0.62		UGC(C)	89	0.62		UGC(C)	89	0.62		UGC(C)	89	0.62		UGC(C)	90	0.62
UGA(*)	14	0.72		UGA(*)	13	0.67		UGA(*)	13	0.67		UGA(*)	13	0.67		UGA(*)	14	0.72
UGG(W)	455	1		UGG(W)	454	1		UGG(W)	454	1		UGG(W)	454	1		UGG(W)	455	1
CGU(R)	308	1.25		CGU(R)	311	1.26		CGU(R)	311	1.26		CGU(R)	311	1.26		CGU(R)	308	1.25
CGC(R)	107	0.43		CGC(R)	105	0.43		CGC(R)	105	0.43		CGC(R)	105	0.43		CGC(R)	108	0.44
CGA(R)	339	1.37		CGA(R)	339	1.37		CGA(R)	339	1.37		CGA(R)	339	1.37		CGA(R)	339	1.37
CGG(R)	98	0.4		CGG(R)	97	0.39		CGG(R)	97	0.39		CGG(R)	97	0.39		CGG(R)	98	0.4
AGU(S)	387	1.18		AGU(S)	391	1.19		AGU(S)	391	1.19		AGU(S)	391	1.19		AGU(S)	390	1.18
AGC(S)	114	0.35		AGC(S)	114	0.35		AGC(S)	114	0.35		AGC(S)	114	0.35		AGC(S)	113	0.34
AGA(R)	469	1.9		AGA(R)	471	1.91		AGA(R)	471	1.91		AGA(R)	471	1.91		AGA(R)	467	1.89
AGG(R)	160	0.65		AGG(R)	159	0.64		AGG(R)	159	0.64		AGG(R)	159	0.64		AGG(R)	160	0.65
GGU(G)	534	1.26		GGU(G)	533	1.25		GGU(G)	533	1.25		GGU(G)	533	1.25		GGU(G)	533	1.25
GGC(G)	185	0.44		GGC(G)	184	0.43		GGC(G)	184	0.43		GGC(G)	184	0.43		GGC(G)	185	0.44
GGA(G)	692	1.63		GGA(G)	689	1.62		GGA(G)	689	1.62		GGA(G)	689	1.62		GGA(G)	691	1.63
GGG(G)	290	0.68		GGG(G)	293	0.69		GGG(G)	293	0.69		GGG(G)	293	0.69		GGG(G)	291	0.68
