# Supplementary material for: Characterization of the complete chloroplast genomes of five Populus species from the western Sichuan plateau, southwest China: comparative and phylogenetic analyses
Source: PeerJ. 2019 Feb 20;7:e6386. doi: 10.7717/peerj.6386 (PMC6387583; doi:10.7717/peerj.6386)
Supplement: Supplemental Information 4 [file peerj-07-6386-s004.xlsx]

## Sheet: Table S4
Table S4 Transitions (Ts) and transversions (Tv) in the four plastomes relative to the plastome of P. xiangchengensis
P. cathayana
Ts									Tv																N.: Number
A-G				C-T					A-T				A-C				T-G				G-C				CDS: Coding regions
N.	CDS	N.	N-CDS	N.	CDS	N.	N-CDS		N.	CDS	N.	N-CDS	N.	CDS	N.	N-CDS	N.	CDS	1	N-CDS	N.	CDS	N.	N-CDS	N-CDS: Non-coding regions
1	ycf1	1	rps15-ycf1	1	rps7	1	rps19-trnH		1	ycf2	1	trnN-trnR	1	ccsA	1	trnV-rps12	1	ycf2	2	trnN-trnR	1	ycf1	1	trnR-trnN
2	ycf1	2	ndhA intron	2	ycf1	2	ndhA intron		2	ycf1	2	ndhE-ndhG	2	ccsA	2	psaC-ndhE	2	ycf2	3	trnN-trnR	2	ndhA	2	petB intron	A: Adenine
3	rps15	3	rpoA-rps11	3	ycf1	3	ndhG-ndhI		3	ycf1	3	trnL-ccsA	3	ycf1	3	ndhF-trnL	3	ycf1	4	rps12-trnV	3	ndhD	3	clpP intron	G: Guanine
4	ndhI	4	atpB-rbcL	4	ycf1	4	rpl16-rps3		4	ndhF	4	trnR-trnN	4	ycf2	4	trnR-trnN	4	rps15	5	clpP-psbB	4	ycf1	4	trnK intron	C: Cytosine
5	ndhD	5	trnF-ndhJ	5	ycf1	5	rpl16-rps3		5	ycf1	5	trnR-trnN	5	ycf2	5	trnR-trnN	5	ndhH	6	trnP-psaJ	5	ycf1			T: Thymine
6	ndhF	6	trnT-trnL	6	ndhA	6	petB intron		6	ycf1	6	trnR-trnN	6	accD	6	clpP intron	6	ycf1	7	accD-psaI	6	cemA
7	ycf1	7	ycf3 intron	7	ccsA	7	clpP intron		7	ycf1	7	accD-psaI	7	rpoC2	7	trnW-trnP	7	atpB	8	accD-psaI	7	rpoC2			Ts: Transitions
8	rps7	8	psaA-ycf3	8	ndhF	8	rps18-rpl20		8	ycf1	8	atpB-rbcL			8	atpB-rbcL	8	rps2	9	trnF-ndhJ	8	matK			Tv: Transversions
9	rpl22	9	psbZ-trnG	9	ndhF	9	rpl33-rps18		9	ycf1	9	ndhC-trnV			9	trnV-trnM	9	atpI	10	trnT-trnL
10	rpl22	10	rpoB-trnC	10	ycf1	10	psbE-petL		10	ycf1	10	trnF-ndhJ			10	trnL-trnF			11	trnS-rps4
11	rpl20	11	rpoB-trnC	11	ycf1	11	petA-psbJ		11	ycf1	11	trnL-trnF			11	trnS-psbZ			12	ycf3 intron
12	ndhK	12	atpH-atpI	12	atpB	12	trnV intron		12	ycf2	12	trnL intron			12	trnT-psbD			13	psaA-ycf3
13	matK	13	trnG-trnR	13	ndhC	13	trnV intron		13	psbB	13	trnL intron			13	trnD-trnY			14	psbZ-trnG
14	psbA	14	trnK-trnQ	14	psaB	14	trnL intron				14	trnL intron			14	psbM-trnD			15	psbZ-trnG
		15	trnK intron	15	psbD	15	trnT-psbD				15	psbM-trnD			15	psbM-trnD			16	petN-psbM
				16	rpoB	16	trnT-psbD				16	trnG-trnR			16	petN-psbM			17	atpH-atpI
				17	rpoB	17	psbM-trnD				17	trnG-trnR			17	rpoB-trnC			18	trnG-trnR
				18	rpoC2	18	rpoC1 intron				18	trnG-trnR			18	rpoB-trnC			19	trnK intron
				19	rpoC2	19	trnG-trnR				19	trnS-trnC			19	rpoB-trnC
						20	trnG intron				20	trnS-trnC			20	rpoC1 intron
						21	trnS-trnC				21	psbK-psbI			21	atpF intron
						22	trnQ-psbK								22	trnG-trnR
						23	trnH-psbA								23	psbK-psbI
															24	rps19-trnH
P. kangdingensis
Ts									Tv
A-G				C-T					A-T				A-C				T-G				G-C
N.	CDS	N.	N-CDS	N.	CDS	N.	N-CDS		N.	CDS	N.	N-CDS	N.	CDS	N.	N-CDS	N.	CDS	N.	N-CDS	N.	CDS	N.	N-CDS
1	ycf2	1	trnL	1	ycf1	1	rps19-trnH		1	ycf1	1	trnN-trnR	1	ycf1	1	trnL-ycf15	1	ycf2	1	rps12-rps7	1	ycf2	1	trnI-rrn16s
2	ycf1	2	rrn23S	2	ycf1	2	rps12-rps7		2	ycf1	2	trnN-trnR	2	ndhA	2	trnN-trnR	2	ycf2	2	rrn23S	2	ycf2	2	ndhA intron
3	ycf1	3	rrn4.5S-rrn5S	3	ycf1	3	rps15-ycf1		3	ccsA	3	trnN-trnR	3	ndhF	3	rps15-ycf1	3	ycf1	3	trnN-trnR	3	ycf1	3	ndhF-trnL
4	ycf1	4	trnN-trnR	4	ycf1	4	rps15-ycf1		4	ndhF	4	trnN-trnR	4	ycf2	4	psaC-ndhE	4	ycf1	4	rps15-ycf1	4	ndhE	4	rrn16S-trnI
5	ycf1	5	trnN-trnR	5	ycf1	5	ndhA intron		5	ycf1	5	trnN-trnR	5	ycf2	5	ndhF-trnL	5	ycf1	5	ndhG-ndhI	5	ndhD	5	rpl16-rps3
6	ycf1	6	rps15-ycf1	6	ycf1	6	ndhA intron		6	ycf1	6	trnN-trnR	6	accD	6	ndhF-trnL	6	ycf1	6	ndhE-ndhG	6	ycf2	6	petB intron
7	ycf1	7	rps15-ycf1	7	ycf1	7	ndhA intron		7	ycf1	7	trnN-trnR	7	rbcL	7	ycf1-ndhF	7	ycf1	7	ndhE-ndhG	7	ycf2	7	petA-psbJ
8	ndhH	8	ndhG-ndhI	8	ycf1	8	ndhG-ndhI		8	cemA	8	trnN-trnR	8	psaB	8	trnR-trnN	8	ndhA	8	ccsA-ndhD	8	rbcL	8	ycf4-cemA
9	ndhH	9	ndhG-ndhI	9	ycf1	9	trnR-trnN		9	ycf4	9	trnN-trnR	9	rpoB	9	rrn23S	9	ndhG	9	ccsA-ndhD	9	atpB	9	rbcL-accD
10	ndhA	10	psaC-ndhE	10	ycf1	10	trnR-trnN		10	rbcL	10	ndhA intron	10	rpoB	10	rps7-rps12	10	ndhF	10	ccsA-ndhD	10	psaA	10	ndhC-trnV
11	ndhI	11	ndhF-trnL	11	ndhH	11	rrn23S-rrn5S		11	rbcL	11	ndhA intron	11	rpoB	11	rps12-clpP	11	rps3	11	trnR-trnN	11	rpoB	11	trnS-rps4
12	ndhI	12	ndhF-trnL	12	ndhA	12	rrn23S		12	atpB	12	ndhG-ndhI	12	rpoC2	12	petL-petG	12	rpl14	12	ycf15-trnL	12	rpoB	12	ycf3-trnS
13	ndhE	13	rps12-trnV	13	ndhA	13	trnL				13	trnL-ccsA	13	atpA	13	trnW-trnP	13	petA	13	rpl16-rps3	13	psbK	13	trnY-trnE
14	psaC	14	rpl20-rps12	14	ndhA	14	rpl16-rps3				14	trnL-ccsA	14	psbA	14	ycf4-cemA	14	petA	14	rpl36-rps8			14	psbM-trnD
15	ndhD	15	psaJ-rpl33	15	ndhD	15	rpl16-rps3				15	ndhF-trnL			15	clpP intron	15	atpB	15	psbB-psbT			15	petN-psbM
16	ccsA	16	petL-petG	16	ndhD	16	rpl16-rps3				16	trnR-trnN			16	rbcL-accD	16	atpB	16	clpP-psbB			16	rpoB-trnC
17	ccsA	17	petA-psbJ	17	ccsA	17	rpl16-rps3				17	trnR-trnN			17	rbcL-accD	17	ndhC	17	rps12-clpP			17	trnK-trnQ
18	ccsA	18	ycf4-cemA	18	ccsA	18	rpl16-rps3				18	trnR-trnN			18	atpB-rbcL	18	psaA	18	trnP-psaJ			18	trnK intron
19	ccsA	19	ycf4-cemA	19	ccsA	19	petB-petD				19	trnR-trnN			19	ndhC-trnV	19	rpoC1	19	trnW-trnP
20	ndhF	20	ycf4-cemA	20	ccsA	20	petB-petD				20	trnR-trnN			20	ndhC-trnV	20	rpoC2	20	petA-psbJ
21	rpl22	21	atpB-rbcL	21	ndhF	21	petB intron				21	trnR-trnN			21	rps4-trnT	21	rps2	21	trnV intron
22	rps3	22	atpB-rbcL	22	ndhF	22	clpP intron				22	trnR-trnN			22	psbZ-trnG	22	atpI	22	ndhC-trnV
23	rps3	23	trnM-atpE	23	ndhF	23	clpP intron				23	trnR-trnN			23	trnS-psbZ	23	matK	23	ndhC-trnV
24	rps3	24	ndhC-trnV	24	ndhF	24	clpP intron				24	trnR-trnN			24	psbC-trnS	24	matK	24	ndhC-trnV
25	rpl20	25	ndhC-trnV	25	ycf1	25	psbE-petL				25	petD-rpoA			25	psbM-trnD			25	ndhC-trnV
26	psaJ	26	ndhC-trnV	26	ycf1	26	trnW-trnP				26	rpl33-rps18			26	psbM-trnD			26	ndhC-trnV
27	petA	27	ndhC-trnV	27	ycf2	27	psbE-petL				27	psaJ-rpl33			27	petN-psbM			27	trnL-trnF
28	psaI	28	ndhC-trnV	28	rps3	28	psbE-petL				28	psbE-petL			28	petN-psbM			28	trnT-trnL
29	rbcL	29	ndhC-trnV	29	rpl16	29	petA-psbJ				29	psbJ-psbL			29	rpoB-trnC			29	ycf3 intron
30	rbcL	30	ndhC-trnV	30	rpl16	30	ycf4-cemA				30	psbJ-psbL			30	rpoB-trnC			30	ycf3 intron
31	rbcL	31	trnF-ndhJ	31	rps8	31	ycf4-cemA				31	petA-psbJ			31	rpoC1 intron			31	psaA-ycf3
32	atpB	32	trnF-ndhJ	32	rpoA	32	ycf4-cemA				32	petA-psbJ			32	rpoC1 intron			32	psbZ-trnG
33	ndhK	33	trnL-trnF	33	psbB	33	trnM-atpE				33	petA-psbJ			33	rpoC1 intron			33	psbZ-trnG
34	rps4	34	trnL-trnF	34	cemA	34	trnV intron				34	cemA-petA			34	rpoC1 intron			34	trnE-trnT
35	psaB	35	trnT-trnL	35	cemA	35	trnV intron				35	ycf4-cemA			35	rpoC1 intron			35	petN-psbM
36	psbD	36	rps4-trnT	36	cemA	36	trnV-trnM				36	ycf4-cemA			36	rpoC1 intron			36	rpoB-trnC
37	rpoB	37	ycf3 intron	37	accD	37	ndhC-trnV				37	accD-psaI			37	rps2-rpoC2			37	rpoB-trnC
38	rpoC1	38	ycf3 intron	38	rbcL	38	ndhC-trnV				38	accD-psaI			38	atpF intron			38	trnG-trnR
39	rpoC2	39	ycf3 intron	39	atpB	39	ndhC-trnV				39	accD-psaI			39	atpF intron			39	trnG-trnR
40	rpoC2	40	psbZ-trnG	40	atpB	40	ndhC-trnV				40	ndhC-trnV			40	trnG intron			40	trnG intron
41	psbA	41	psbZ-trnG	41	atpE	41	ndhC-trnV				41	ndhC-trnV			41	trnS-trnG			41	trnS-trnG
42	psbA	42	trnT-psbD	42	ndhC	42	ndhC-trnV				42	ndhC-trnV			42	psbK-psbI			42	trnQ-psbK
		43	petN-psbM	43	psaA	43	ndhC-trnV				43	ndhC-trnV			43	trnQ-psbK			43	trnK-trnQ
		44	trnC-petN	44	psaB	44	ndhC-trnV				44	ndhC-trnV			44	trnK intron			44	trnK-trnQ
		45	rps2-rpoC2	45	psbD	45	ndhJ-ndhK				45	ndhC-trnV			45	trnK-trnQ			45	trnK intron
		46	atpH-atpI	46	rpoB	46	trnF-ndhJ				46	ndhC-trnV			46	trnK-trnQ
		47	atpH-atpI	47	rpoB	47	ycf3-trnS				47	trnF-ndhJ			47	trnH-psbA
		48	atpH-atpI	48	rpoB	48	ycf3 intron				48	trnF-ndhJ
		49	atpF-atpH	49	rpoB	49	psbZ-trnG				49	trnF-ndhJ
		50	atpF intron	50	rpoC1	50	trnT-psbD				50	trnL-trnF
		51	atpA-atpF	51	rpoC1	51	trnE-trnT				51	trnL-trnF
		52	trnG-trnR	52	rpoC2	52	trnD-trnY				52	rps4-trnT
		53	trnG intron	53	rpoC2	53	psbM-trnD				53	trnS-rps4
		54	trnS	54	atpI	54	psbM-trnD				54	ycf3-trnS
		55	psbK-psbI	55	psbA	55	trnC-petN				55	psbZ-trnG
		56	trnK-trnQ			56	rpoB-trnC				56	psbZ-trnG
		57	trnK-trnQ			57	rpoC2-rpoC1				57	psbZ-trnG
		58	trnK-trnQ			58	atpH-atpI				58	psbZ-trnG
		59	trnK-trnQ			59	atpH-atpI				59	psbZ-trnG
		60	trnK intron			60	atpF intron				60	psbZ-trnG
						61	atpF intron				61	psbZ-trnG
						62	trnG intron				62	psbZ-trnG
						63	trnS-trnG				63	psbZ-trnG
						64	trnQ-psbK				64	psbZ-trnG
						65	trnQ-psbK				65	trnE-trnT
						66	trnQ				66	trnE-trnT
						67	trnK-trnQ				67	psbM-trnD
						68	trnK-trnQ				68	petN-psbM
						69	trnK-trnQ				69	trnC-petN
						70	trnK intron				70	rpoB-trnC
											71	trnG-trnR
											72	trnG-trnR
											73	trnG-trnR
											74	trnG-trnR
											75	trnG-trnR
											76	trnG-trnR
											77	trnS-trnG
											78	trnS-trnG
											79	trnS-trnG
											80	trnS-trnG
											81	trnS-trnG
											82	trnQ-psbK
											83	trnK-trnQ
P. pseudoglauca
Ts									Tv
A-G				C-T					A-T				A-C				T-G				G-C
N.	CDS	N.	N-CDS	N.	CDS	N.	N-CDS		N.	CDS	N.	N-CDS	N.	CDS	N.	N-CDS	N.	CDS	N.	N-CDS	N.	CDS	N.	N-CDS
1	ycf2	1	trnL	1	ycf1	1	rps19-trnH		1	ycf1	1	trnN-trnR	1	ycf1	1	trnL-ycf15	1	ycf2	1	rps12-rps7	1	ycf2	1	trnI-rrn16S
2	ycf1	2	rrn23S	2	ycf1	2	rps12-rps7		2	ycf1	2	trnN-trnR	2	ndhA	2	trnN-trnR	2	ycf2	2	rrn23S	2	ycf2	2	ndhA intron
3	ycf1	3	rrn4.5S-rrn23S	3	ycf1	3	rps15-ycf1		3	ccsA	3	trnN-trnR	3	ndhF	3	rps15-ycf1	3	ycf1	3	trnN-trnR	3	ycf1	3	ndhF-trnL
4	ycf1	4	trnN-trnR	4	ycf1	4	rps15-ycf1		4	ndhF	4	trnN-trnR	4	ycf2	4	psaC-ndhE	4	ycf1	4	rps15-ycf1	4	ndhE	4	rrn16S-trnI
5	ycf1	5	trnN-trnR	5	ycf1	5	ndhA intron		5	ycf1	5	trnN-trnR	5	ycf2	5	ndhF-trnL	5	ycf1	5	ndhE-ndhG	5	ndhD	5	rpl16-rps3
6	ycf1	6	rps15-ycf1	6	ycf1	6	ndhA intron		6	ycf1	6	trnN-trnR	6	petL	6	ndhF-trnL	6	ycf1	6	ndhE-ndhG	6	ycf2	6	petB intron
7	ycf1	7	rps15-ycf1	7	ycf1	7	ndhA intron		7	ycf1	7	trnN-trnR	7	accD	7	ycf1-ndhF	7	ycf1	7	ccsA-ndhD	7	ycf2	7	petA-psbJ
8	ndhH	8	ndhG-ndhI	8	ycf1	8	ndhG-ndhI		8	cemA	8	trnN-trnR	8	rbcL	8	trnR-trnN	8	ndhA	8	ccsA-ndhD	8	rbcL	8	rbcL-accD
9	ndhH	9	ndhG-ndhI	9	ycf1	9	trnR-trnN		9	ycf4	9	trnN-trnR	9	rps14	9	rrn23S	9	ndhG	9	ccsA-ndhD	9	atpB	9	ndhC-trnV
10	ndhA	10	psaC-ndhE	10	ycf1	10	rrn23S-rrn4.5S		10	rbcL	10	ndhA intron	10	rpoB	10	rps7-rps12	10	ndhF	10	trnR-trnN	10	psaA	10	trnS-rps4
11	ndhI	11	ndhF-trnL	11	ndhH	11	rrn23S		11	rbcL	11	ndhA intron	11	rpoB	11	clpP intron	11	rps3	11	ycf15-trnL	11	rpoB	11	ycf3-trnS
12	ndhI	12	ndhF-trnL	12	ndhA	12	trnR-trnN		12	atpB	12	trnL-ccsA	12	rpoB	12	rps12-clpP	12	rpl14	12	rpl16-rps3	12	rpoB	12	trnY-trnT
13	ndhE	13	rps12-trnV	13	ndhA	13	trnL				13	trnL-ccsA	13	rpoC2	13	trnW-trnP	13	petA	13	rpl36-rps8	13	psbK	13	psbZ-trnG
14	psaC	14	rpl20-rps12	14	ndhA	14	rpl16-rps3				14	ndhF-trnL	14	atpA	14	ycf4-cemA	14	petA	14	psbB-psbT	14	matK	14	petN-psbM
15	ndhD	15	psaJ-rpl33	15	ndhD	15	rpl16-rps3				15	trnR-trnN	15	psbA	15	rbcL-accD	15	atpB	15	clpP-psbB			15	rpoB-trnC
16	ccsA	16	petL-petG	16	ndhD	16	rpl16-rps3				16	trnR-trnN			16	rbcL-accD	16	atpB	16	rps12-clpP			16	trnK-trnQ
17	ccsA	17	psbJ-psbL	17	ccsA	17	rpl16-rps3				17	trnR-trnN			17	atpB-rbcL	17	ndhC	17	trnF-psaJ
18	ccsA	18	petA-psbJ	18	ccsA	18	rpl16-rps3				18	trnR-trnN			18	ndhC-trnV	18	psaA	18	trnW-trnP
19	ccsA	19	ycf4-cemA	19	ccsA	19	petB-petD				19	trnR-trnN			19	ndhC-trnV	19	rpoC1	19	petA-psbJ
20	ndhF	20	ycf4-cemA	20	ccsA	20	petB-petD				20	trnR-trnN			20	rps4-trnT	20	rpoC2	20	trnV intron
21	ycf1	21	ycf4-cemA	21	ndhF	21	petB intron				21	trnR-trnN			21	psbZ-trnG	21	rps2	21	ndhC-trnV
22	rpl22	22	atpB-rbcL	22	ndhF	22	clpP intron				22	trnR-trnN			22	trnS-psbZ	22	atpI	22	ndhC-trnV
23	rps3	23	atpB-rbcL	23	ndhF	23	clpP intron				23	trnR-trnN			23	psbC-trnS	23	matK	23	ndhC-trnV
24	rps3	24	trnM-atpE	24	ndhF	24	clpP intron				24	petD-rpoA			24	psbM-trnD	24	matK	24	ndhC-trnV
25	rps3	25	ndhC-trnV	25	ycf1	25	trnW-trnP				25	rpl33-rps18			25	petN-psbM			25	ndhC-trnV
26	rpl20	26	ndhC-trnV	26	ycf1	26	psbE-petL				26	psaJ-rpl33			26	petN-psbM			26	trnL-trnF
27	psaJ	27	ndhC-trnV	27	ycf2	27	psbE-petL				27	psbE-petL			27	rpoB-trnC			27	trnT-trnL
28	petA	28	ndhC-trnV	28	rps3	28	psbE-petL				28	psbJ-psbL			28	rpoB-trnC			28	ycf3 intron
29	psaI	29	ndhC-trnV	29	rpl16	29	petA-psbJ				29	psbJ-psbL			29	rpoC1 intron			29	ycf3 intron
30	rbcL	30	ndhC-trnV	30	rpl16	30	trnM-atpE				30	petA-psbJ			30	rpoC1 intron			30	psaA-ycf3
31	rbcL	31	ndhC-trnV	31	rps8	31	trnV-trnM				31	petA-psbJ			31	rpoC1 intron			31	psbZ-trnG
32	rbcL	32	trnF-ndhJ	32	rpoA	32	trnV intron				32	petA-psbJ			32	rpoC1 intron			32	psbZ-trnG
33	atpB	33	trnF-ndhJ	33	psbB	33	trnV intron				33	cemA-petA			33	rpoC1 intron			33	trnE-trnT
34	ndhK	34	trnL-trnF	34	cemA	34	ndhC-trnV				34	ycf4-cemA			34	rpoC1 intron			34	psbM-trnD
35	rps4	35	trnL-trnF	35	cemA	35	ndhC-trnV				35	accD-psaI			35	rps2-rpoC2			35	petN-psbM
36	psaB	36	trnT-trnL	36	cemA	36	ndhC-trnV				36	accD-psaI			36	atpF intron			36	rpoB-trnC
37	psbD	37	rps4-trnT	37	accD	37	ndhC-trnV				37	accD-psaI			37	atpF intron			37	rpoB-trnC
38	rpoB	38	ycf3 intron	38	rbcL	38	ndhC-trnV				38	ndhC-trnV			38	trnG intron			38	trnG-trnR
39	rpoC1	39	ycf3 intron	39	atpB	39	ndhC-trnV				39	ndhC-trnV			39	trnS-trnG			39	trnG-trnR
40	rpoC2	40	ycf3 intron	40	atpB	40	ndhC-trnV				40	ndhC-trnV			40	psbK-psbI			40	trnG intron
41	rpoC2	41	psbZ-trnG	41	atpE	41	ndhC-trnV				41	ndhC-trnV			41	trnQ-psbK			41	trnS-trnG
42	rpoC2	42	psbZ-trnG	42	ndhC	42	ndhJ-ndhK				42	ndhC-trnV			42	trnK-trnQ			42	trnQ-psbK
43	psbA	43	trnT-psbD	43	psaA	43	trnF-ndhJ				43	ndhC-trnV			43	trnK-trnQ			43	trnK-trnQ
44	psbA	44	trnE-trnT	44	psaA	44	ycf3-trnS				44	ndhC-trnV			44	trnK intron			44	trnK-trnQ
		45	petN-psbM	45	psaB	45	ycf3 intron				45	trnF-ndhJ			45	trnH-psbA			45	trnK intron
		46	trnC-petN	46	psbD	46	psbZ-trnG				46	trnF-ndhJ
		47	rps2-rpoC2	47	rpoB	47	psbZ-trnG				47	trnF-ndhJ
		48	atpH-atpI	48	rpoB	48	trnT-psbD				48	trnL-trnF
		49	atpH-atpI	49	rpoB	49	trnE-trnT				49	trnL-trnF
		50	atpH-atpI	50	rpoB	50	trnD-trnY				50	rps4-trnT
		51	atpF-atpH	51	rpoC1	51	psbZ-trnG				51	trnS-rps4
		52	atpF intron	52	rpoC1	52	psbM-trnD				52	ycf3-trnS
		53	atpA-atpF	53	rpoC2	53	psbM-trnD				53	psbZ-trnG
		54	trnG-trnR	54	rpoC2	54	psbM-trnD				54	psbZ-trnG
		55	trnG intron	55	atpI	55	trnC-petN				55	psbZ-trnG
		56	trnS	56	matK	56	rpoB-trnC				56	psbZ-trnG
		57	psbK-psbI	57	psbA	57	rpoC2-rpoC1				57	psbZ-trnG
		58	trnK-trnQ			58	atpH-atpI				58	psbZ-trnG
		59	trnK-trnQ			59	atpH-atpI				59	psbZ-trnG
		60	trnK-trnQ			60	atpF intron				60	psbZ-trnG
		61	trnK-trnQ			61	atpF intron				61	psbZ-trnG
		62	trnK intron			62	trnG intron				62	psbZ-trnG
						63	trnQ-psbK				63	trnE-trnT
						64	trnQ-psbK				64	trnE-trnT
						65	trnQ				65	psbM-trnD
						66	trnK-trnQ				66	petN-psbM
						67	trnK-trnQ				67	trnC-petN
						68	trnK-trnQ				68	rpoB-trnC
											69	trnG-trnR
											70	trnG-trnR
											71	trnG-trnR
											72	trnG-trnR
											73	trnG-trnR
											74	trnG-trnR
											75	trnG-trnR
											76	trnS-trnG
											77	trnS-trnG
											78	trnS-trnG
											79	trnQ-psbK
											80	trnK-trnQ
P. schneideri
Ts									Tv
A-G				C-T					A-T				A-C				T-G				G-C
N.	CDS	N.	N-CDS	N.	CDS	N.	N-CDS		N.	CDS	N.	N-CDS	N.	CDS	N.	N-CDS	N.	CDS	N.	N-CDS	N.	CDS	N.	N-CDS
1	ycf2	1	trnL	1	ycf1	1	rps19-trnH		1	ycf1	1	trnN-trnR	1	ycf1	1	trnL-ycf15	1	ycf2	1	rps12-rps7	1	ycf2	1	trnI-rrn16S
2	ycf1	2	rrn23S	2	ycf1	2	rps12-rps7		2	ycf1	2	trnN-trnR	2	ndhA	2	trnN-trnR	2	ycf2	2	rrn23S	2	ycf2	2	ndhA intron
3	ycf1	3	rrn4.5S-rrn23S	3	ycf1	3	rps15-ycf1		3	ccsA	3	trnN-trnR	3	ndhF	3	rps15-ycf1	3	ycf1	3	trnN-trnR	3	ycf1	3	ndhF-trnL
4	ycf1	4	trnN-trnR	4	ycf1	4	rps15-ycf1		4	ndhF	4	trnN-trnR	4	ycf2	4	psaC-ndhE	4	ycf1	4	rps15-ycf1	4	ndhE	4	rrn16S-trnI
5	ycf1	5	trnN-trnR	5	ycf1	5	ndhA intron		5	ycf1	5	trnN-trnR	5	ycf2	5	ndhF-trnL	5	ycf1	5	ndhE-ndhG	5	ndhD	5	rpl16-rps3
6	ycf1	6	rps15-ycf1	6	ycf1	6	ndhA intron		6	ycf1	6	trnN-trnR	6	petL	6	ndhF-trnL	6	ycf1	6	ndhE-ndhG	6	ycf2	6	petB intron
7	ycf1	7	rps15-ycf1	7	ycf1	7	ndhA intron		7	ycf1	7	trnN-trnR	7	accD	7	ycf1-ndhF	7	ycf1	7	ccsA-ndhD	7	ycf2	7	petA-psbJ
8	ndhH	8	ndhG-ndhI	8	ycf1	8	ndhG-ndhI		8	cemA	8	trnN-trnR	8	rbcL	8	trnR-trnN	8	ndhA	8	ccsA-ndhD	8	rbcL	8	rbcL-accD
9	ndhH	9	ndhG-ndhI	9	ycf1	9	trnR-trnN		9	ycf4	9	trnN-trnR	9	rps14	9	rrn23S	9	ndhG	9	ccsA-ndhD	9	atpB	9	ndhC-trnV
10	ndhA	10	psaC-ndhE	10	ycf1	10	trnR-trnN		10	rbcL	10	ndhA intron	10	rpoB	10	rps7-rps12	10	ndhF	10	trnR-trnN	10	psaA	10	trnS-rps4
11	ndhI	11	ndhF-trnL	11	ndhH	11	rrn23S-rrn4.5S		11	rbcL	11	ndhA intron	11	rpoB	11	clpP intron	11	rps3	11	ycf15-trnL	11	rpoB	11	ycf3-trnS
12	ndhI	12	ndhF-trnL	12	ndhA	12	rrn23S		12	atpB	12	trnL-ccsA	12	rpoB	12	rps12-clpP	12	rpl14	12	rpl16-rps3	12	rpoB	12	trnY-trnT
13	ndhE	13	rps12-trnV	13	ndhA	13	trnL				13	trnL-ccsA	13	rpoC2	13	trnW-trnP	13	petA	13	rpl36-rps8	13	psbK	13	psbZ-trnG
14	psaC	14	rpl20-rps12	14	ndhA	14	rpl16-rps3				14	ndhF-trnL	14	atpA	14	ycf4-cemA	14	petA	14	psbB-psbT	14	matK	14	petN-psbM
15	ndhD	15	psaJ-rpl33	15	ndhD	15	rpl16-rps3				15	trnR-trnN	15	psbA	15	rbcL-accD	15	atpB	15	clpP-psbB			15	rpoB-trnC
16	ccsA	16	petL-petG	16	ndhD	16	rpl16-rps3				16	trnR-trnN			16	rbcL-accD	16	atpB	16	rps12-clpP			16	trnK-trnQ
17	ccsA	17	psbJ-psbL	17	ccsA	17	rpl16-rps3				17	trnR-trnN			17	atpB-rbcL	17	ndhC	17	trnF-psaJ
18	ccsA	18	petA-psbJ	18	ccsA	18	rpl16-rps3				18	trnR-trnN			18	ndhC-trnV	18	psaA	18	trnW-trnP
19	ccsA	19	ycf4-cemA	19	ccsA	19	petB-petD				19	trnR-trnN			19	rps4-trnT	19	rpoC1	19	petA-psbJ
20	ndhF	20	ycf4-cemA	20	ccsA	20	petB-petD				20	trnR-trnN			20	trnS-psbZ	20	rps2	20	trnV intron
21	ycf1	21	ycf4-cemA	21	ndhF	21	petB intron				21	trnR-trnN			21	psbC-trnS	21	atpI	21	ndhC-trnV
22	rpl22	22	atpB-rbcL	22	ndhF	22	clpP intron				22	trnR-trnN			22	psbZ-trnG	22	rpoC2	22	ndhC-trnV
23	rps3	23	atpB-rbcL	23	ndhF	23	clpP intron				23	trnR-trnN			23	psbM-trnD	23	matK	23	ndhC-trnV
24	rps3	24	trnM-atpE	24	ndhF	24	clpP intron				24	petD-rpoA			24	petN-psbM	24	matK	24	ndhC-trnV
25	rps3	25	ndhC-trnV	25	ycf1	25	trnW-trnP				25	rpl33-rps18			25	petN-psbM			25	ndhC-trnV
26	rpl20	26	ndhC-trnV	26	ycf1	26	psbE-petL				26	psaJ-rpl33			26	rpoB-trnC			26	trnL-trnF
27	psaJ	27	ndhC-trnV	27	ycf2	27	psbE-petL				27	psbE-petL			27	rpoB-trnC			27	trnT-trnL
28	petA	28	ndhC-trnV	28	rps3	28	psbE-petL				28	psbJ-psbL			28	rpoC1 intron			28	ycf3 intron
29	psaI	29	ndhC-trnV	29	rpl16	29	petA-psbJ				29	psbJ-psbL			29	rpoC1 intron			29	ycf3 intron
30	rbcL	30	ndhC-trnV	30	rpl16	30	trnM-atpE				30	petA-psbJ			30	rpoC1 intron			30	psaA-ycf3
31	rbcL	31	ndhC-trnV	31	rps8	31	trnV-trnM				31	petA-psbJ			31	rpoC1 intron			31	psbZ-trnG
32	rbcL	32	trnF-ndhJ	32	rpoA	32	trnV intron				32	petA-psbJ			32	rpoC1 intron			32	psbZ-trnG
33	atpB	33	trnF-ndhJ	33	psbB	33	trnV intron				33	cemA-petA			33	rpoC1 intron			33	trnE-trnT
34	ndhK	34	trnL-trnF	34	cemA	34	ndhC-trnV				34	ycf4-cemA			34	rps2-rpoC2			34	petN-psbM
35	rps4	35	trnL-trnF	35	cemA	35	ndhC-trnV				35	accD-psaI			35	atpF intron			35	rpoB-trnC
36	psaB	36	trnT-trnL	36	cemA	36	ndhC-trnV				36	accD-psaI			36	atpF intron			36	rpoB-trnC
37	psbD	37	rps4-trnT	37	accD	37	ndhC-trnV				37	accD-psaI			37	trnG intron			37	trnG-trnR
38	rpoB	38	ycf3 intron	38	rbcL	38	ndhC-trnV				38	ndhC-trnV			38	psbK-psbI			38	trnG-trnR
39	rpoC1	39	ycf3 intron	39	atpB	39	ndhC-trnV				39	ndhC-trnV			39	trnQ-psbK			39	trnG intron
40	rpoC2	40	ycf3 intron	40	atpB	40	ndhC-trnV				40	ndhC-trnV			40	trnK-trnQ			40	trnQ-psbK
41	rpoC2	41	psbZ-trnG	41	atpE	41	ndhC-trnV				41	ndhC-trnV			41	trnK-trnQ			41	trnK-trnQ
42	psbA	42	psbZ-trnG	42	ndhC	42	ndhJ-ndhK				42	ndhC-trnV			42	trnK intron			42	trnK-trnQ
43	psbA	43	trnT-psbD	43	psaA	43	trnF-ndhJ				43	ndhC-trnV			43	trnS-trnG			43	trnK intron
		44	trnE-trnT	44	psaB	44	ycf3-trnS				44	ndhC-trnV			44	trnH-psbA
		45	petN-psbM	45	psbD	45	ycf3 intron				45	trnF-ndhJ
		46	trnC-petN	46	rpoB	46	psbZ-trnG				46	trnF-ndhJ
		47	rps2-rpoC2	47	rpoB	47	psbZ-trnG				47	trnF-ndhJ
		48	atpH-atpI	48	rpoB	48	trnT-psbD				48	trnL-trnF
		49	atpH-atpI	49	rpoB	49	trnE-trnT				49	trnL-trnF
		50	atpH-atpI	50	rpoC1	50	trnD-trnY				50	rps4-trnT
		51	atpF-atpH	51	rpoC1	51	psbZ-trnG				51	trnS-rps4
		52	atpF intron	52	rpoC2	52	psbM-trnD				52	ycf3-trnS
		53	atpA-atpF	53	rpoC2	53	psbM-trnD				53	psbZ-trnG
		54	trnG-trnR	54	atpI	54	psbM-trnD				54	psbZ-trnG
		55	trnG intron	55	matK	55	trnC-petN				55	psbZ-trnG
		56	trnS	56	psbA	56	rpoB-trnC				56	psbZ-trnG
		57	psbK-psbI			57	rpoC2-rpoC1				57	psbZ-trnG
		58	trnK-trnQ			58	atpH-atpI				58	psbZ-trnG
		59	trnK-trnQ			59	atpH-atpI				59	psbZ-trnG
		60	trnK-trnQ			60	atpF intron				60	psbZ-trnG
		61	trnK-trnQ			61	atpF intron				61	psbZ-trnG
		62	trnK intron			62	trnG intron				62	psbZ-trnG
						63	trnS-trnG				63	trnE-trnT
						64	trnQ-psbK				64	trnE-trnT
						65	trnQ-psbK				65	psbM-trnD
						66	trnQ				66	petN-psbM
						67	trnK-trnQ				67	trnC-petN
						68	trnK-trnQ				68	rpoB-trnC
						69	trnK-trnQ				69	trnG-trnR
											70	trnG-trnR
											71	trnG-trnR
											72	trnG-trnR
											73	trnG-trnR
											74	trnG-trnR
											75	trnG-trnR
											76	trnS-trnG
											77	trnS-trnG
											78	trnS-trnG
											79	trnQ-psbK
											80	trnK-trnQ
