# Supplementary material for: Characterization of the complete chloroplast genomes of five Populus species from the western Sichuan plateau, southwest China: comparative and phylogenetic analyses
Source: PeerJ. 2019 Feb 20;7:e6386. doi: 10.7717/peerj.6386 (PMC6387583; doi:10.7717/peerj.6386)
Supplement: Supplemental Information 5 [file peerj-07-6386-s005.xlsx]

## Sheet: Table S5
Table S5 Synonymous (Ks) and nonsynonymous (Ka) analysis of the five species based on 78 unique CDS genes, with P. xiangchengensis as the reference
		P. xiangchengensis-P. cathayana			P. xaingchengensis-P. pseudoglauca			P. xiangchengensis-P. kangdingensis			P. xiangchengensis-P. schneideri
	gene	Ka	Ks	Ka/Ks	Ka	Ks	Ka/Ks	Ka	Ks	Ka/Ks	Ka	Ks	Ka/Ks
1	rpoC2	0.000938853	0.00103301	0.908848	0.00131931	0.00176509	0.747448	0.00168538	0.0016703	1.00903	0.00131931	0.00176509	0.747448
2	rpoC1	/	/	/	0.0013813	0.00323651	0.426787	0.0013813	0.00323651	0.426787	0.0013813	0.00323651	0.426787
3	rpoB	0.00038213	0.00169205	0.225839	0.00122643	0.00926349	0.132394	0.00122643	0.00926349	0.132394	0.00122643	0.00926349	0.132394
4	psaA	/	/	/	0.00110343	0.00230548	0.478613	0.00175108	0.00187656	0.933134	0.00110343	0.00230548	0.478613
5	ndhC	/	/	/	0.00342998	0.0150872	0.227344	0.00342998	0.0150872	0.227344	0.00342998	0.0150872	0.227344
6	atpB	0.000895849	0.00266599	0.336029	0.00174981	0.0144971	0.120701	0.00174981	0.0144971	0.120701	0.00174981	0.0144971	0.120701
7	rbcL	/	/	/	0.00653008	0.00288422	2.26407	0.00653008	0.00288422	2.26407	0.00653008	0.00288422	2.26407
8	accD	/	/	/	0.000852569	0.00314573	0.271024	0.000852569	0.00314573	0.271024	0.000852569	0.00314573	0.271024
9	cemA	/	/	/	0.00202858	0.0163677	0.123938	0.00202858	0.0163677	0.123938	0.00202858	0.0163677	0.123938
10	petA	/	/	/	0.00129072	0.0110202	0.117123	0.00129072	0.0110202	0.117123	0.00129072	0.0110202	0.117123
11	rps3	/	/	/	0.00437358	0.0159989	0.273368	0.00437358	0.0159989	0.273368	0.00437358	0.0159989	0.273368
12	ycf1	0.0072447	0.0145213	0.498901	0.00297837	0.00539194	0.552374	0.00297837	0.00539194	0.552374	0.00297837	0.00539194	0.552374
13	ndhF	0.000621213	0.00451798	0.137498	0.00341778	0.00387566	0.881857	0.00341778	0.00387566	0.881857	0.00341778	0.00387566	0.881857
14	ccsA	/	/	/	0.00771712	0.0130515	0.591283	0.00771712	0.0130515	0.591283	0.00771712	0.0130515	0.591283
15	ndhD	0.000861826	0.00281724	0.305911	0.00187763	0.0044716	0.419901	0.00187763	0.0044716	0.419901	0.00187763	0.0044716	0.419901
16	ndhE	/	/	/	0.004317	0.0144598	0.298552	0.004317	0.0144598	0.298552	0.004317	0.0144598	0.298552
17	ndhA	0.00121451	0.00371982	0.326497	0.00127948	0.016341	0.0782988	0.00127948	0.016341	0.0782988	0.00127948	0.016341	0.0782988
18	rps15	0.00485726	0.0164547	0.29519	/	/	/	/	/	/	/	/	/
19	ycf1	0.00142464	0.00322492	0.441758	0.00339939	0.00832322	0.408423	0.00339939	0.00832322	0.408423	0.00339939	0.00832322	0.408423
