# Supplementary material for: Characterization of the complete chloroplast genomes of five Populus species from the western Sichuan plateau, southwest China: comparative and phylogenetic analyses
Source: PeerJ. 2019 Feb 20;7:e6386. doi: 10.7717/peerj.6386 (PMC6387583; doi:10.7717/peerj.6386)
Supplement: Supplemental Information 6 [file peerj-07-6386-s006.xlsx]

## Sheet: Table S6
	Table S6 SSR repeats in the five cp genomes
		P. cathayana					P. kangdingensis					P. pseudoglauca					P. schneideri					P. xiangchengensis
		SSR type	SSR	size	start		SSR type	SSR	size	start		SSR type	SSR	size	start		SSR type	SSR	size	start		SSR type	SSR	size	start
LSC	trnH-psbA	P1	(A)13	13	184		P1	(A)14	14	185		P1	(A)14	14	185		P1	(A)14	14	185
	trnK-trnQ	P1	(A)15	15	4696		P1	(A)16	16	4734		P1	(A)16	16	4734		P1	(A)16	16	4734		P1	(A)14	14	4706
	trnK-trnQ																					P1	(T)12	12	5415
	psbI-trnS						P1	(A)12	12	6843		P1	(A)12	12	6843		P1	(A)12	12	6843
	trnS-trnG	P1	(T)13	13	7525		P1	(T)12	12	7607		P1	(T)12	12	7607		P1	(T)12	12	7607
	trnG intron	P1	(T)14	14	8189																	P1	(T)15	15	8209
	atpA-atpF						C	(T)15g(A)12	28	10425		C	(T)15g(A)12	28	10425		C	(T)15g(A)12	28	10425
	atpF-atpH																					P1	(A)14	14	12053
	rpoC2	P1	(T)14	14	17339		P1	(T)14	14	17485		P1	(T)14	14	17485		P1	(T)14	14	17485		P1	(T)14	14	17349
	rpoC1 intron																					P1	(A)13	13	21828
	rpoB	P1	(T)12	12	25078		P1	(T)12	12	25197		P1	(T)12	12	25197		P1	(T)12	12	25197		P1	(T)12	12	25097
	rpoB-trnC	P1	(A)13	13	26187		P1	(A)12	12	26304		P1	(A)12	12	26304		P1	(A)12	12	26304		P1	(A)13	13	26206
	rpoB-trnC						P1	(A)13	13	26957		P1	(A)13	13	26957		P1	(A)13	13	26957		P1	(A)12	12	26878
	trnC-petN	P1	(T)16	16	27246		P1	(T)16	16	27335		P1	(T)16	16	27335		P1	(T)16	16	27335		P1	(T)17	17	27235
	trnD-trnY	P1	(A)12	12	30465																	P1	(A)12	12	30311
	petN-psbM						P1	(T)13	13	28396		P1	(T)13	13	28396		P1	(T)13	13	28396
	psbM-trnD						C	(AAT)5aaggatCCCCtttgggaaCgaaattCtgCtatttgtaCCCCttttaCagaaaatgaagagatgaattgatgta(T)13	101	30099		C	(AAT)5aaggatCCCCtttgggaaCgaaattCtgCtatttgtaCCCCttttaCagaaaatgaagagatgaattgatgta(T)14	102	30099		C	(AAT)5aaggatCCCCtttgggaaCgaaattCtgCtatttgtaCCCCttttaCagaaaatgaagagatgaattgatgta(T)13	101	30099
	trnS-psbZ						P2	(TA)6	12	35467		P2	(TA)6	12	35456		P2	(TA)6	12	35456
	trnG-trnfM						P1	(A)12	12	36636		P1	(A)12	12	36624		P1	(A)12	12	36625
	rps4-trnT						P1	(A)13	13	46240		P1	(A)13	13	46228		P1	(A)13	13	46229		P1	(A)14	14	46228
	trnL intron	P1	(A)14	14	47313		C	(AAT)5(A)12	27	47268		C	(AAT)5(A)12	27	47256		C	(AAT)5(A)12	27	47257		C	(AAT)5(A)17	32	47236
	trnL-trnF	P1	(T)12	12	47782		P1	(T)12	12	47750		P1	(T)12	12	47738		P1	(T)12	12	47739		P1	(T)13	13	47723
	ndhC-trnV						P1	(A)12	12	50663		P1	(A)12	12	50651		P1	(A)12	12	50652
	ndhC-trnV						P1	(A)12	12	51413		P1	(A)12	12	51401		P1	(A)12	12	51402
	ndhC-trnV						P1	(T)13	13	51580		P1	(T)13	13	51568		P1	(T)13	13	51569
	ycf4-cemA	P1	(T)13	13	60867		P1	(T)16	16	60881		P1	(T)16	16	60869		P1	(T)16	16	60870		P1	(T)13	13	60874
	cemA-petA	P1	(T)12	12	61953																	P2	(AT)9	18	63709
	petA-psbJ	P2	(AT)8	16	63684		P2	(AT)11	22	63707		P2	(AT)11	22	63696		P2	(AT)11	22	63697		P1	(T)12	12	65515
	psbE-petL						P1	(A)12	12	65613		P1	(A)12	12	65602		P1	(A)12	12	65603
	petL-petG	P1	(A)15	15	66219		P1	(A)17	17	66219		P1	(A)17	17	66208		P1	(A)17	17	66209
	clpP intron						P1	(A)12	12	70791		P1	(A)12	12	70780		P1	(A)12	12	70781
	clpP intron						P1	(A)12	12	71130		P1	(A)12	12	71119		P1	(A)12	12	71120
	rps8	P1	(A)13	13	81107		P1	(A)13	13	81068		P1	(A)13	13	81057		P1	(A)13	13	81058		P1	(A)13	13	81080
	rps8-rpl14	P1	(T)12	12	81343		P1	(T)16	16	81304		P1	(T)16	16	81293		P1	(T)16	16	81294		P1	(T)16	16	81316
	rpl14-rpl16	P1	(A)14	14	81972		P1	(A)14	14	81937		P1	(A)14	14	81926		P1	(A)14	14	81927
IRb	rps19-rpl2	P1	(T)16	16	85365		P1	(T)16	16	85301		P1	(T)16	16	85290		P1	(T)16	16	85291		P1	(T)15	15	85325
	rrn5S-trnR	P1	(A)13	13	109408		P1	(A)13	13	109345		P1	(A)13	13	109334		P1	(A)13	13	109335		P1	(A)13	13	109292
SSC	ndhF-trnL	P1	(A)13	13	114919		P1	(A)12	12	114814		P1	(A)12	12	114803		P1	(A)12	12	114804		P1	(A)12	12	114796
	ndhF-trnL	P1	(A)12	12	115369
	ndhD-psaC	P1	(T)14	14	118451																	P1	(T)15	15	118592
	ndhD-psaC	P1	(T)15	15	118787
	psaC-ndhE																					P1	(T)15	15	118592
	ndhA intron	C	(AT)7aaatgatagtaaaatgCtCggtagCattaCagta(AT)8	64	122406
	ccsA-ndhD						P1	(T)15	15	116662		P1	(T)15	15	116651		P1	(T)15	15	116652
IRa	psaC-ndhE						P1	(T)12	12	118641		P1	(T)12	12	118630		P1	(T)12	12	118631		P1	(T)13	13	131974
	ndhG-ndhI						P1	(T)12	12	119973		P1	(T)12	12	119962		P1	(T)12	12	119963
	ndhG-ndhI						C	(AT)6aaatgatagtaaaatgCtCggtagCattaCagta(AT)7	60	122216		C	(AT)6aaatgatagtaaaatgCtCggtagCattaCagta(AT)7	60	122205		C	(AT)6aaatgatagtaaaatgCtCggtagCattaCagta(AT)7	60	122206
	ndhH-rps15	P1	(A)12	12	124630		P1	(A)13	13	124419		P1	(A)13	13	124408		P1	(A)13	13	124409
	trnR-rrn5S	P1	(T)13	13	132221		P1	(T)13	13	131955		P1	(T)13	13	131944		P1	(T)13	13	131945		P1	(T)13	13	131974
	rpl2-rps19	P1	(A)16	16	156261		P1	(A)16	16	155996		P1	(A)16	16	155985		P1	(A)16	16	155986		P1	(A)15	15	155939
Notes:	LSC: Large single copy
	SSC: Small single copy
	IRa: Inverted repeat a
	IRa: Inverted repeat b
	P1: Mononucleotide repeats
	P2: Dinucleotide repeats
	C: Compount repeats
	SSR: Simple sequence Repeats
