# Supplementary material for: Characterization of the complete chloroplast genomes of five Populus species from the western Sichuan plateau, southwest China: comparative and phylogenetic analyses
Source: PeerJ. 2019 Feb 20;7:e6386. doi: 10.7717/peerj.6386 (PMC6387583; doi:10.7717/peerj.6386)
Supplement: Supplemental Information 7 [file peerj-07-6386-s007.xlsx]

## Sheet: Table S6
Table S6 Repeat sequences in the five cp genomes
	repeatA location	start locus	region	repeatB location	start locus	region	length	type
P. cathayana	ycf3-trnS	44992	LSC	accD	57935	LSC	76	F
P. cathayana	ycf3-trnS	45000	LSC	accD	57943	LSC	68	F
P. cathayana	psaB	38814	LSC	psaA	41038	LSC	55	F
P. cathayana	ndhF-trnL	115262	SSC	ndhF-trnL	115283	SSC	42	F
P. cathayana	rpl16-rps3	83643	LSC	rpl16-rps3	83643	LSC	47	P
P. cathayana	ndhA intron	122385	SSC	ndhA intron	122433	SSC	35	F
P. cathayana	rps12-trnV	100362	IRb	rps12-trnV	100362	IRb	34	R
P. cathayana	rps12-trnV	100362	IRb	trnV-rps12	141244	IRa	34	C
P. cathayana	trnV-rps12	141244	IRa	trnV-rps12	141244	IRa	34	R
P. cathayana	rps12-trnV	100005	IRb	ndhA intron	121699	SSC	42	F
P. cathayana	ndhA intron	121699	SSC	trnV-rps12	141593	IRa	42	P
P. cathayana	psbZ-trnG	36345	LSC	psbZ-trnG	36345	LSC	39	R
P. cathayana	psaB	38854	LSC	psaA	41078	LSC	41	F
P. cathayana	petN-psbM	27593	LSC	petN-psbM	27593	LSC	35	P
P. cathayana	trnS-trnG	7138	LSC	trnS-trnG	7138	LSC	39	P
P. cathayana	ycf3 intron	43766	LSC	rps12-trnV	100007	IRb	39	F
P. cathayana	ycf3 intron	43766	LSC	trnV-rps12	141594	IRa	39	P
P. cathayana	ycf2	92563	IRb	ycf2	92581	IRb	39	F
P. cathayana	ycf2	92563	IRb	ycf2	148020	IRa	39	P
P. cathayana	ycf2	92581	IRa	ycf2	149038	IRa	39	P
P. cathayana	ycf2	149020	IRa	ycf2	149038	IRa	39	F
P. cathayana	ycf15-trnL	95343	IRb	ycf15-trnL	95385	IRb	30	P
P. cathayana	ycf15-trnL	95343	IRb	trnL-ycf15	146225	IRa	30	F
P. cathayana	ycf15-trnL	95385	IRb	trnL-ycf15	146267	IRa	30	F
P. cathayana	trnL-ycf15	146225	IRa	trnL-ycf15	146267	IRa	30	P
P. cathayana	rpl16-rps3	82616	LSC	rpl16-rps3	82632	LSC	33	F
P. cathayana	psaB	38842	LSC	psaA	41066	LSC	36	F
P. cathayana	psbI-trnS	6828	LSC	trnS-GGA	45179	LSC	30	P
P. cathayana	petB-petD	77471	LSC	petB-petD	77496	LSC	30	F
P. cathayana	trnE-trnT	30989	LSC	trnE-trnT	30989	LSC	35	P
P. cathayana	rps12-trnV	100015	IRb	ndhA intron	121709	SSC	32	F
P. cathayana	ndhA intron	121709	SSC	trnV-rps12	141593	IRa	32	P
P. cathayana	clpP intron	71027	LSC	clpP intron	71048	LSC	34	R
P. cathayana	trnC-petN	27277	LSC	trnC-petN	27296	LSC	31	F
P. cathayana	trnC-petN	27283	LSC	trnC-petN	27292	LSC	33	R
P. cathayana	psbJ-psbL	64294	LSC	psbJ-psbL	64294	LSC	33	P
P. cathayana	petA-psbJ	63676	LSC	petA-psbJ	63676	LSC	30	P
P. cathayana	ndhF	116269	SSC	ndhF	116269	SSC	30	P
P. cathayana	ndhD-psaC	118401	SSC	ndhD-psaC	118453	SSC	30	P
P. cathayana	ndhD-psaC	118433	SSC	ndhD-psaC	118433	SSC	30	R
P. cathayana	ndhA intron	122405	SSC	ndhA intron	122455	SSC	30	F
P. cathayana	psbM-trnD	30007	LSC	trnW-trnP	66787	LSC	32	F
P. cathayana	psbZ-trnG	36342	LSC	psbZ-trnG	36364	LSC	32	R
P. cathayana	ycf2	90149	IRb	ycf2	90170	IRb	32	F
P. cathayana	ycf2	90149	IRb	ycf2	151438	IRa	32	P
P. cathayana	ycf2	90170	IRb	ycf2	151459	IRa	32	P
P. cathayana	ycf2	151438	IRa	ycf2	151459	IRa	32	F
P. cathayana	trnS-trnG	7135	LSC	trnS-trnG	7135	LSC	31	P
P. cathayana	rps2-rpoC2	15037	LSC	clpP intron	71025	LSC	31	P
P. cathayana	psaA-ycf3	42554	LSC	psaA-ycf3	42576	LSC	31	F
P. cathayana	psbI-trnS	6825	LSC	psbC-trnS	35345	LSC	30	F
P. cathayana	trnS-trnG	7183	LSC	ndhC-trnV	50809	LSC	30	C
P. cathayana	rpoC intron	21758	LSC	clpP intron	71028	LSC	30	F
P. cathayana	trnR-trnN	109817	IRb	trnR-trnN	109847	IRb	30	F
P. cathayana	trnR-trnN	109817	IRb	rrn4.5S-rrn23S	131763	IRa	30	P
P. cathayana	trnR-trnN	109847	IRb	rrn4.5S-rrn23S	131793	IRa	30	P
P. cathayana	ndhF-trnL	115369	SSC	ndhD-psaC	118420	SSC	30	F
P. cathayana	rrn4.5S-rrn23S	131763	IRa	rrn4.5S-rrn23S	131793	IRa	30	F
P. kangdingensis	ycf3-trnS	44919	LSC	accD	57979	LSC	76	F
P. kangdingensis	ycf3-trnS	44927	LSC	accD	57987	LSC	68	F
P. kangdingensis	trnE-trnT	30904	LSC	trnE-trnT	30904	LSC	59	P
P. kangdingensis	psaB	38695	LSC	psaA	40919	LSC	55	F
P. kangdingensis	rpl16-rps3	83580	LSC	rpl16-rps3	83580	LSC	46	P
P. kangdingensis	rps12-trnV	99929	IRb	ndhA intron	121566	SSC	42	F
P. kangdingensis	ndhA intron	121566	SSC	trnV-rps12	141340	IRa	42	P
P. kangdingensis	ndhA	121195	SSC	ndhA intron	122241	SSC	33	F
P. kangdingensis	petA-psbJ	63701	LSC	petA-psbJ	63701	LSC	32	P
P. kangdingensis	psaB	38735	LSC	psaA	40959	LSC	41	F
P. kangdingensis	petN-psbM	27682	LSC	petN-psbM	27682	LSC	35	P
P. kangdingensis	ycf3 intron	43676	LSC	rps12-trnV	99931	IRb	39	F
P. kangdingensis	ycf3 intron	43676	LSC	trnV-rps12	141341	IRa	39	P
P. kangdingensis	ycf2	92499	IRb	ycf2	92517	IRb	39	F
P. kangdingensis	ycf2	92499	IRb	ycf2	148755	IRa	39	P
P. kangdingensis	ycf2	92517	IRa	ycf2	148773	IRa	39	P
P. kangdingensis	ycf2	148755	IRa	ycf2	148773	IRa	39	F
P. kangdingensis	ycf15-trnL	95272	IRb	ycf15-trnL	95314	IRb	30	P
P. kangdingensis	ycf15-trnL	95272	IRb	trnL-ycf15	145967	IRa	30	F
P. kangdingensis	ycf15-trnL	95314	IRb	trnL-ycf15	146009	IRa	30	F
P. kangdingensis	ccsA	116120	SSC	ccsA	116120	SSC	30	P
P. kangdingensis	trnL-ycf15	145967	IRa	trnL-ycf15	146009	IRa	30	P
P. kangdingensis	rps12-trnV	99939	IRb	ndhA intron	121576	SSC	32	F
P. kangdingensis	ndhA intron	121576	SSC	trnV-rps12	141340	IRa	32	P
P. kangdingensis	rps12-clpP	70391	LSC	rps12-clpP	70391	LSC	34	P
P. kangdingensis	ndhF-trnL	115215	SSC	ndhF-trnL	115215	SSC	34	P
P. kangdingensis	trnC-petN	27366	LSC	trnC-petN	27385	LSC	31	F
P. kangdingensis	psaB	38723	LSC	psaA	40947	LSC	36	F
P. kangdingensis	petA-psbJ	63699	LSC	petA-psbJ	63700	LSC	33	C
P. kangdingensis	petA-psbJ	63700	LSC	petA-psbJ	63700	LSC	33	R
P. kangdingensis	psbI-trnS	6873	LSC	trnS-GGA	45106	LSC	30	P
P. kangdingensis	trnC-petN	27368	LSC	trnC-petN	27368	LSC	31	R
P. kangdingensis	petA-psbJ	63702	LSC	petA-psbJ	63702	LSC	31	R
P. kangdingensis	atpA-atpF	10423	LSC	atpA-atpF	10423	LSC	33	P
P. kangdingensis	trnC-petN	27372	LSC	trnC-petN	27381	LSC	33	R
P. kangdingensis	atpA-atpF	10421	LSC	petL-petG	66216	LSC	30	C
P. kangdingensis	trnE-trnT	30965	LSC	trnE-trnT	30985	LSC	30	F
P. kangdingensis	psbZ-trnG	36297	LSC	psbZ-trnG	36321	LSC	30	F
P. kangdingensis	ycf3 intron	42805	LSC	ycf3 intron	42805	LSC	30	P
P. kangdingensis	rbcL-accD	57347	LSC	rbcL-accD	57347	LSC	30	P
P. kangdingensis	rps2-rpoC2	15137	LSC	clpP intron	71013	LSC	31	P
P. kangdingensis	psaA-ycf3	42382	LSC	ycf3 intron	42829	LSC	31	R
P. kangdingensis	psbI-trnS	6870	LSC	psbC-trnS	35247	LSC	30	F
P. kangdingensis	atpA-atpF	10423	LSC	petL-petG	66217	LSC	30	C
P. kangdingensis	atpA-atpF	10425	LSC	clpP intron	71012	LSC	30	P
P. kangdingensis	ycf3 intron	42794	LSC	trnLintron	47233	LSC	30	P
P. kangdingensis	trnLintron	47263	LSC	ndhD-psaC	118291	SSC	30	P
P. kangdingensis	trnLintron	47266	LSC	ndhD-psaC	118285	SSC	30	P
P. kangdingensis	petL-petG	66204	LSC	rps8-rpl14	81303	LSC	30	P
P. pseudoglauca	ycf3-trnS	44907	LSC	accD	57967	LSC	76	F
P. pseudoglauca	ycf3-trnS	44915	LSC	accD	57975	LSC	68	F
P. pseudoglauca	psaB	38683	LSC	psaA	40907	LSC	55	F
P. pseudoglauca	rpl16-rps3	83569	LSC	rpl16-rps3	83569	LSC	46	P
P. pseudoglauca	rps12-trnV	99918	IRb	ndhA intron	121555	SSC	42	F
P. pseudoglauca	ndhA intron	121555	SSC	trnV-rps12	141329	IRa	42	P
P. pseudoglauca	ndhA	122184	SSC	ndhA intron	122230	SSC	33	F
P. pseudoglauca	petA-psbJ	63690	LSC	petA-psbJ	63690	LSC	32	P
P. pseudoglauca	psaB	38723	LSC	psaA	40947	LSC	41	F
P. pseudoglauca	petN-psbM	27682	LSC	petN-psbM	27682	LSC	35	P
P. pseudoglauca	ycf3 intron	43664	LSC	rps12-trnV	99920	IRb	39	F
P. pseudoglauca	ycf3 intron	43664	LSC	trnV-rps12	141330	IRa	39	P
P. pseudoglauca	ycf2	92488	IRb	ycf2	92506	IRb	39	F
P. pseudoglauca	ycf2	92488	IRb	ycf2	148744	IRa	39	P
P. pseudoglauca	ycf2	92506	IRa	ycf2	148762	IRa	39	P
P. pseudoglauca	ycf2	148744	IRa	ycf2	148762	IRa	39	F
P. pseudoglauca	ycf15-trnL	95261	IRb	ycf15-trnL	95303	IRb	30	P
P. pseudoglauca	ycf15-trnL	95261	IRb	trnL-ycf15	145956	IRa	30	F
P. pseudoglauca	ycf15-trnL	95303	IRb	trnL-ycf15	145998	IRa	30	F
P. pseudoglauca	ccsA	116109	SSC	ccsA	116109	SSC	30	P
P. pseudoglauca	trnL-ycf15	145956	IRa	trnL-ycf15	145998	IRa	30	P
P. pseudoglauca	rps12-trnV	99928	IRb	ndhA intron	121565	SSC	32	F
P. pseudoglauca	ndhA intron	121565	SSC	trnV-rps12	141329	IRa	32	P
P. pseudoglauca	rps12-clpP	70380	LSC	rps12-clpP	70380	LSC	34	P
P. pseudoglauca	ndhF-trnL	115204	SSC	ndhF-trnL	115204	SSC	34	P
P. pseudoglauca	trnC-petN	27366	LSC	trnC-petN	27385	LSC	31	F
P. pseudoglauca	psaB	38711	LSC	psaA	40935	LSC	36	F
P. pseudoglauca	petA-psbJ	63688	LSC	petA-psbJ	63689	LSC	33	C
P. pseudoglauca	petA-psbJ	63689	LSC	petA-psbJ	63689	LSC	33	R
P. pseudoglauca	psbI-trnS	6873	LSC	trnS-GGA	45094	LSC	30	P
P. pseudoglauca	trnC-petN	27368	LSC	trnC-petN	27368	LSC	31	R
P. pseudoglauca	petA-psbJ	63691	LSC	petA-psbJ	63691	LSC	31	R
P. pseudoglauca	atpA-atpF	10423	LSC	atpA-atpF	10423	LSC	33	P
P. pseudoglauca	trnC-petN	27372	LSC	trnC-petN	27381	LSC	33	R
P. pseudoglauca	atpA-atpF	10421	LSC	petL-petG	66205	LSC	30	C
P. pseudoglauca	psbZ-trnG	36285	LSC	psbZ-trnG	36309	LSC	30	F
P. pseudoglauca	ycf3 intron	42793	LSC	ycf3 intron	42793	LSC	30	P
P. pseudoglauca	rbcL-accD	57335	LSC	rbcL-accD	57335	LSC	30	P
P. pseudoglauca	rps2-rpoC2	15137	LSC	clpP intron	71002	LSC	31	P
P. pseudoglauca	psaA-ycf3	42370	LSC	ycf3 intron	42817	LSC	31	R
P. pseudoglauca	psbI-trnS	6870	LSC	psbC-trnS	35236	LSC	30	F
P. pseudoglauca	atpA-atpF	10423	LSC	petL-petG	66206	LSC	30	C
P. pseudoglauca	atpA-atpF	10425	LSC	clpP intron	71001	LSC	30	P
P. pseudoglauca	trnE-trnT	30934	LSC	rrpl16-rps3	82778	LSC	30	F
P. pseudoglauca	ycf3 intron	42782	LSC	trnLintron	47221	LSC	30	P
P. pseudoglauca	trnLintron	47251	LSC	ndhD-psaC	118280	SSC	30	P
P. pseudoglauca	trnLintron	47254	LSC	ndhD-psaC	118274	SSC	30	P
P. pseudoglauca	petL-petG	66193	LSC	rps8-rpl14	81292	LSC	30	P
P. schneideri	ycf3-trnS	44908	LSC	accD	57968	LSC	76	F
P. schneideri	ycf3-trnS	44916	LSC	accD	40908	LSC	68	F
P. schneideri	psaB	38684	LSC	psaA	40908	LSC	55	F
P. schneideri	rpl16-rps3	83570	LSC	rpl16-rps3	83570	LSC	46	P
P. schneideri	rps12-trnV	99919	IRb	ndhA intron	121556	SSC	42	F
P. schneideri	ndhA intron	121556	SSC	trnV-rps12	141330	IRa	42	P
P. schneideri	ndhA	122185	SSC	ndhA intron	122231	SSC	33	F
P. schneideri	petA-psbJ	63691	LSC	petA-psbJ	63691	LSC	32	P
P. schneideri	psaB	38724	LSC	psaA	40948	LSC	41	F
P. schneideri	petN-psbM	27682	LSC	petN-psbM	27682	LSC	35	P
P. schneideri	ycf3 intron	43665	LSC	rps12-trnV	99921	IRb	39	F
P. schneideri	ycf3 intron	43665	LSC	trnV-rps12	141331	IRa	39	P
P. schneideri	ycf2	92489	IRb	ycf2	92507	IRb	39	F
P. schneideri	ycf2	92489	IRb	ycf2	148745	IRa	39	P
P. schneideri	ycf2	92507	IRa	ycf2	148763	IRa	39	P
P. schneideri	ycf2	148745	IRa	ycf2	148763	IRa	39	F
P. schneideri	ycf15-trnL	95262	IRb	ycf15-trnL	95304	IRb	30	P
P. schneideri	ycf15-trnL	95262	IRb	trnL-ycf15	145957	IRa	30	F
P. schneideri	ycf15-trnL	95304	IRb	trnL-ycf15	145999	IRa	30	F
P. schneideri	ccsA	116110	SSC	ccsA	116110	SSC	30	P
P. schneideri	trnL-ycf15	145957	IRa	trnL-ycf15	145999	IRa	30	P
P. schneideri	rps12-trnV	99929	IRb	ndhA intron	121566	SSC	32	F
P. schneideri	ndhA intron	121566	SSC	trnV-rps12	141330	IRa	32	P
P. schneideri	rps12-clpP	70381	LSC	rps12-clpP	70381	LSC	34	P
P. schneideri	ndhF-trnL	115205	SSC	ndhF-trnL	115205	SSC	34	P
P. schneideri	trnC-petN	27366	LSC	trnC-petN	27385	LSC	31	F
P. schneideri	psaB	38712	LSC	psaA	40936	LSC	36	F
P. schneideri	petA-psbJ	63689	LSC	petA-psbJ	63690	LSC	33	C
P. schneideri	petA-psbJ	63690	LSC	petA-psbJ	63690	LSC	33	R
P. schneideri	psbI-trnS	6873	LSC	trnS-GGA	45095	LSC	30	P
P. schneideri	trnC-petN	27368	LSC	trnC-petN	27368	LSC	31	R
P. schneideri	petA-psbJ	63692	LSC	petA-psbJ	63692	LSC	31	R
P. schneideri	atpA-atpF	10423	LSC	atpA-atpF	10423	LSC	33	P
P. schneideri	trnC-petN	27372	LSC	trnC-petN	27381	LSC	33	R
P. schneideri	atpA-atpF	10421	LSC	petL-petG	66206	LSC	30	C
P. schneideri	psbZ-trnG	36286	LSC	psbZ-trnG	36310	LSC	30	F
P. schneideri	ycf3 intron	42794	LSC	ycf3 intron	42794	LSC	30	P
P. schneideri	rbcL-accD	57336	LSC	rbcL-accD	57336	LSC	30	P
P. schneideri	rps2-rpoC2	15137	LSC	clpP intron	71003	LSC	31	P
P. schneideri	psaA-ycf3	42371	LSC	ycf3 intron	42818	LSC	31	R
P. schneideri	psbI-trnS	6870	LSC	psbC-trnS	35236	LSC	30	F
P. schneideri	atpA-atpF	10423	LSC	petL-petG	66207	LSC	30	C
P. schneideri	atpA-atpF	10425	LSC	clpP intron	71002	LSC	30	P
P. schneideri	trnE-trnT	30934	LSC	rrpl16-rps3	82779	LSC	30	F
P. schneideri	ycf3 intron	42783	LSC	trnLintron	47222	LSC	30	P
P. schneideri	trnLintron	47252	LSC	ndhD-psaC	118281	SSC	30	P
P. schneideri	trnLintron	47255	LSC	ndhD-psaC	118275	SSC	30	P
P. schneideri	petL-petG	66194	LSC	rps8-rpl14	81293	LSC	30	P
P. xiangchengensis	repeatA location	start locus	region	repeatB location	start locus	region	length	type
P. xiangchengensis	ycf3-trnS	44919	LSC	accD	57948	LSC	76	F
P. xiangchengensis	ycf3-trnS	44927	LSC	accD	57956	LSC	68	F
P. xiangchengensis	psaB	38721	LSC	psaA	40945	LSC	55	F
P. xiangchengensis	ndhA intron	122187	SSC	ndhA intron	122231	SSC	44	F
P. xiangchengensis	rpl16-rps3	83603	LSC	rpl16-rps3	83603	LSC	47	P
P. xiangchengensis	rps12-trnV	99891	IRb	ndhA intron	121501	SSC	42	F
P. xiangchengensis	ndhA intron	121501	SSC	trnV-rps12	141344	IRa	42	P
P. xiangchengensis	psaB	38761	LSC	psaA	40985	LSC	41	F
P. xiangchengensis	petN-psbM	27583	LSC	petN-psbM	27583	LSC	35	P
P. xiangchengensis	ycf3 intron	43675	LSC	rps12-trnV	99893	IRb	39	F
P. xiangchengensis	ycf3 intron	43675	LSC	trnV-rps12	141345	IRa	39	P
P. xiangchengensis	ycf2	92522	IRb	ycf2	92540	IRb	39	F
P. xiangchengensis	ycf2	92522	IRb	ycf2	148698	IRa	39	P
P. xiangchengensis	ycf2	92540	IRa	ycf2	148716	IRa	39	P
P. xiangchengensis	ycf2	148698	IRa	ycf2	148716	IRa	39	F
P. xiangchengensis	rpl16-rps3	82578	LSC	rpl16-rps3	82594	LSC	33	F
P. xiangchengensis	psbZ-trnG	36257	LSC	psbZ-trnG	36257	LSC	34	R
P. xiangchengensis	psaB	38749	LSC	psaA	40973	LSC	36	F
P. xiangchengensis	psbZ-trnG	36247	LSC	psbZ-trnG	36247	LSC	33	R
P. xiangchengensis	psbI-trnS	6820	LSC	trnS-GGA	45106	LSC	30	P
P. xiangchengensis	petA-psbJ	63701	LSC	petA-psbJ	63703	LSC	30	P
P. xiangchengensis	clpP-psbB	72564	LSC	clpP-psbB	72591	LSC	30	F
P. xiangchengensis	ycf1	118225	SSC	ycf1	118226	SSC	30	R
P. xiangchengensis	trnE-trnT	30835	LSC	trnE-trnT	30835	LSC	35	P
P. xiangchengensis	rpoC intron	21812	LSC	rpoC intron	21812	LSC	32	R
P. xiangchengensis	ndhC-trnV	50744	LSC	ndhC-trnV	50764	LSC	32	F
P. xiangchengensis	rps12-trnV	99901	IRb	ndhA intron	121511	SSC	32	F
P. xiangchengensis	ndhA intron	121511	SSC	trnV-rps12	141344	IRa	32	P
P. xiangchengensis	ycf1	128883	SSC	ycf1	128883	SSC	32	P
P. xiangchengensis	petA-psbJ	63696	LSC	petA-psbJ	63697	LSC	34	C
P. xiangchengensis	trnC-petN	27267	LSC	trnC-petN	27286	LSC	31	F
P. xiangchengensis	psbZ-trnG	36186	LSC	psbZ-trnG	36306	LSC	31	F
P. xiangchengensis	trnC-petN	27273	LSC	trnC-petN	27282	LSC	33	R
P. xiangchengensis	psbM-trnD	29851	LSC	trnW-trnP	66768	LSC	33	F
P. xiangchengensis	psbZ-trnG	36248	LSC	psbZ-trnG	36267	LSC	33	R
P. xiangchengensis	psbZ-trnG	36183	LSC	psbZ-trnG	36277	LSC	30	R
P. xiangchengensis	ycf3 intron	42827	LSC	ycf3 intron	42827	LSC	30	P
P. xiangchengensis	trnL intron	47235	LSC	trnL intron	47238	LSC	30	F
P. xiangchengensis	rps12-trnV	100256	IRb	trnV-rps12	140995	IRa	30	C
P. xiangchengensis	ccsA	116076	SSC	ccsA	116076	SSC	30	P
P. xiangchengensis	ycf2	90108	IRb	ycf2	90129	IRb	32	F
P. xiangchengensis	ycf2	90108	IRb	ycf2	151116	IRa	32	P
P. xiangchengensis	ycf2	90129	IRb	ycf2	151137	IRa	32	P
P. xiangchengensis	ycf2	151116	IRa	ycf2	151137	IRa	32	F
P. xiangchengensis	psbI-trnS	6817	LSC	psbC-trnS	35179	LSC	30	F
P. xiangchengensis	trnS-trnG	7001	LSC	clpP-psbB	72632	LSC	30	R
P. xiangchengensis	trnS-trnG	7187	LSC	ndhC-trnV	50781	LSC	30	C
P. xiangchengensis	ndhD-psaC	118211	SSC	ndhD-psaC	118254	SSC	30	P
